# Supplementary material
Source: MDPI journal article supplement (https://www.mdpi.com/2073-4344/9/4/356)

## Analytical data for synthesized products

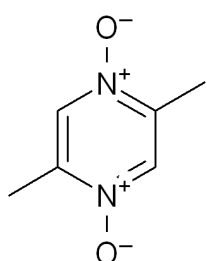

2,6-Dimethylpyrazine-1,4-dioxide was isolated as a white solid.  $^1\text{H}$  NMR (400 MHz, DMSO- $d_6$ ):  $\delta$  = 2.26 (s, 6H,  $\text{CH}_3$ ), 8.50 (s, 2H, CH).  $^{13}\text{C}$  NMR (100 MHz, DMSO- $d_6$ ):  $\delta$  = 14.3, 135.3, 144.4.

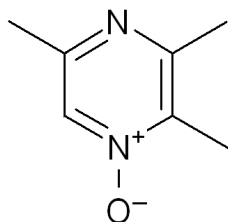

2,3,5-Trimethylpyrazine-1-oxide was isolated as a brown liquid.  $^1\text{H}$  NMR (400 MHz, DMSO- $d_6$ ):  $\delta$  = 2.30–2.48 (m, 9H,  $\text{CH}_3$ ), 8.31 (s, 1H, CH).  $^{13}\text{C}$  NMR (100 MHz, DMSO- $d_6$ ):  $\delta$  = 21.0, 22.4, 22.5, 143.3, 152.6, 153.3, 155.1.

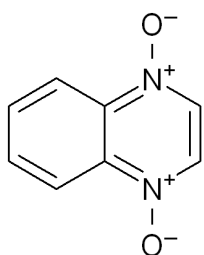

Quinoxaline-1,4-dioxide was isolated as an orange solid.  $^1\text{H}$  NMR (400 MHz, DMSO- $d_6$ ):  $\delta$  = 7.95–8.05 (m, 2H, CH), 8.43–8.52 (m, 2H, CH), 8.54 (s, 2H, CH).  $^{13}\text{C}$  NMR (100 MHz,  $\text{CCl}_3\text{D}$ ):  $\delta$  = 120.6, 130.4, 132.2, 138.6.

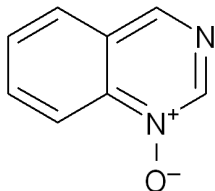

Quinazoline-1-oxide was isolated as a white solid.  $^1\text{H}$  NMR (400 MHz, DMSO- $d_6$ ):  $\delta$  = 7.89–7.95 (dd,  $J$  = 7.9, 7.2 Hz, 1H, CH), 8.07–8.14 (dd,  $J$  = 8.1, 7.8 Hz, 1H, CH), 8.30 (d,  $J$  = 8.2 Hz, 1H, CH), 8.47 (d,  $J$  = 8.7, 1H, CH), 9.14 (s, 1H, CH), 9.31 (s, 1H, CH).  $^{13}\text{C}$  NMR (100 MHz, DMSO- $d_6$ ):  $\delta$  = 118.3, 128.6, 130.7, 135.4, 143.4, 147.4.

2,6-Dimethylpyrazine-1,4-dioxide  $^1\text{H}$  NMR 400 MHz,  $\text{DMSO-d}_6$

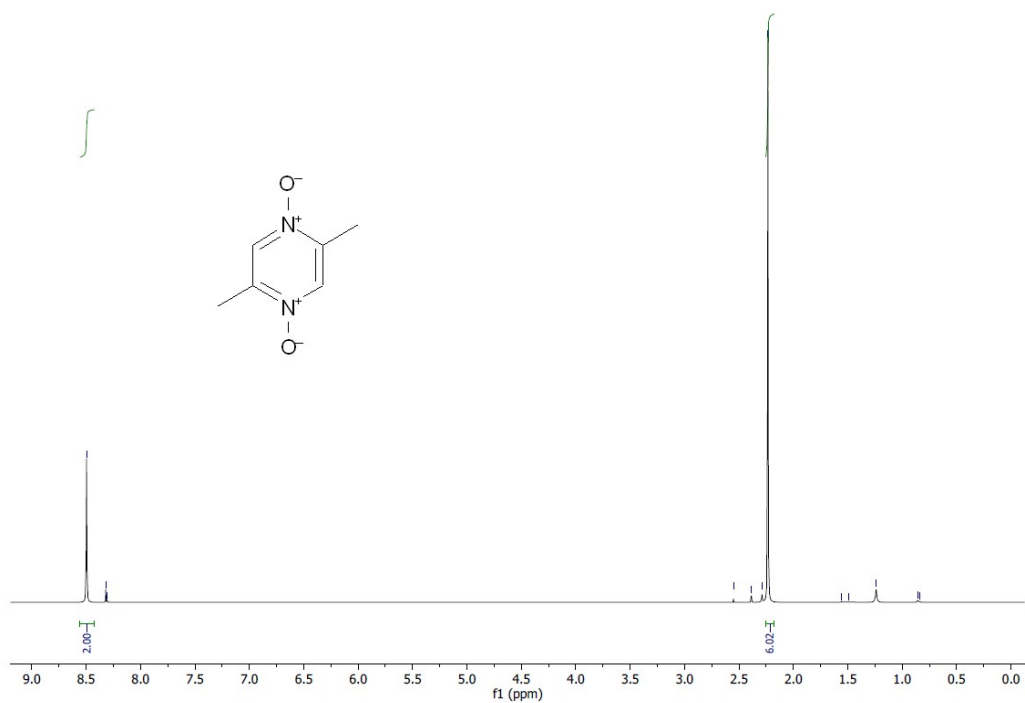

2,6-Dimethylpyrazine-1,4-dioxide  $^{13}\text{C}$  NMR 100 MHz,  $\text{DMSO-d}_6$

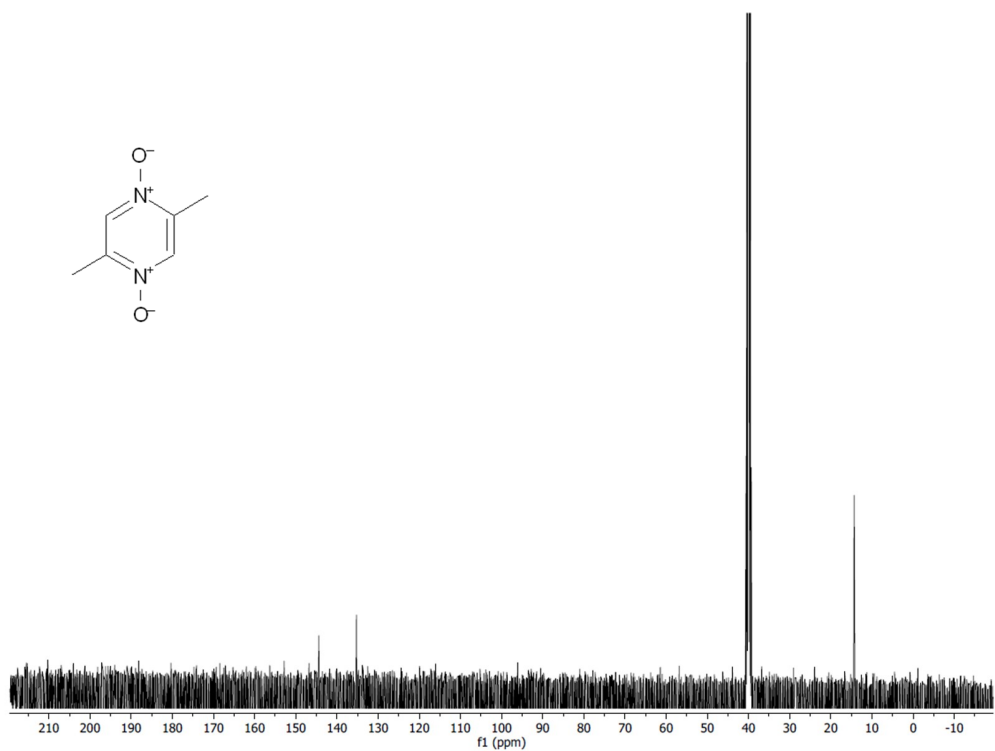

2,3,5,-Trimethylpyrazine-1-oxide  $^1\text{H}$  NMR 400 MHz, DMSO- $\text{d}_6$

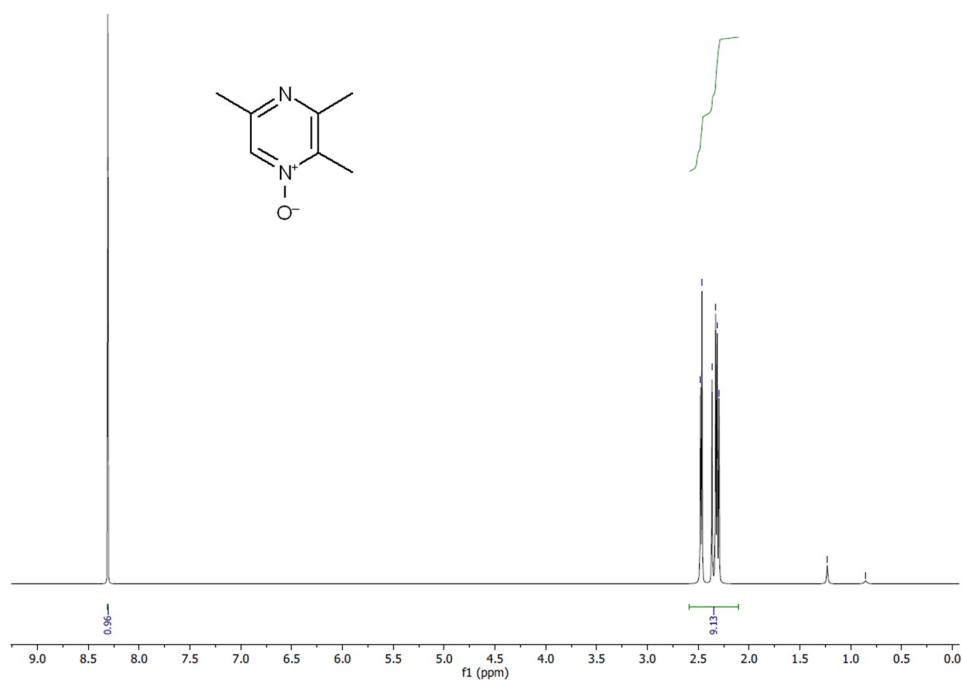

2,3,5,-Trimethylpyrazine-1-oxide  $^{13}\text{C}$  NMR 100 MHz, DMSO- $\text{d}_6$

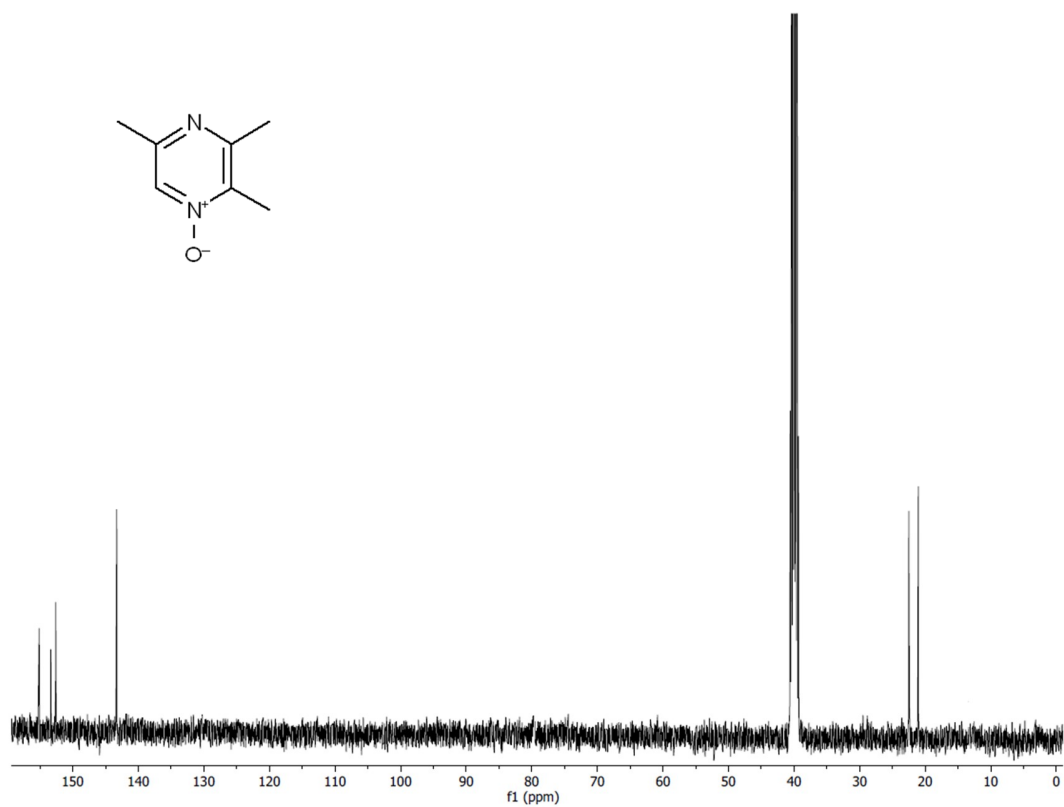

Quinoxaline-1,4-dioxide  $^1\text{H}$  NMR 400 MHz,  $\text{DMSO-d}_6$

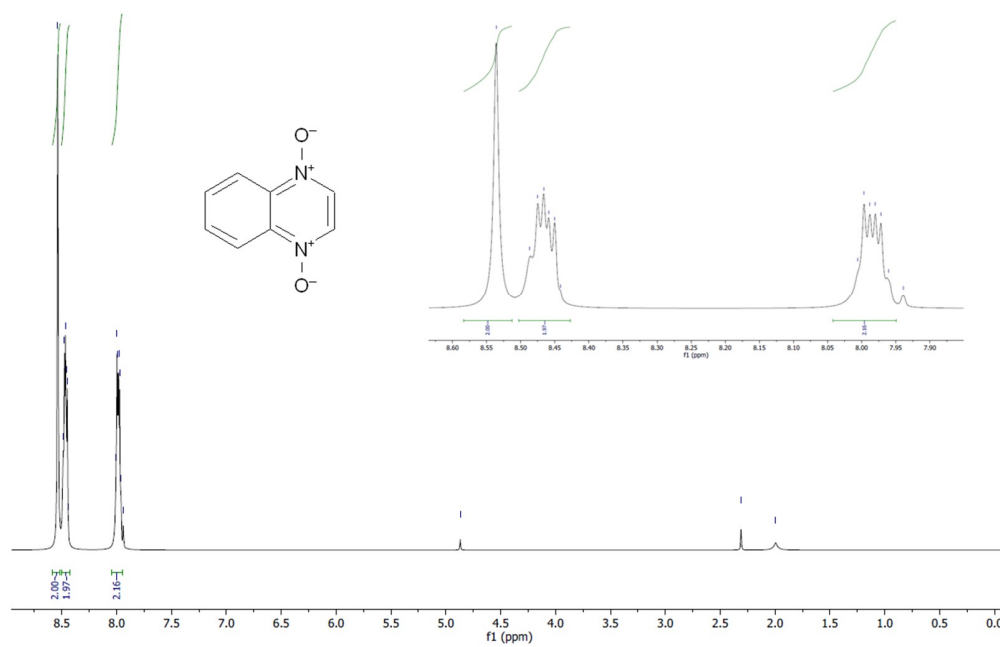

Quinoxaline-1,4-dioxide  $^{13}\text{C}$  NMR 100 MHz,  $\text{CCl}_3\text{D}$

Quinazoline-1-oxide  $^1\text{H}$  NMR 400 MHz,  $\text{DMSO-d}_6$

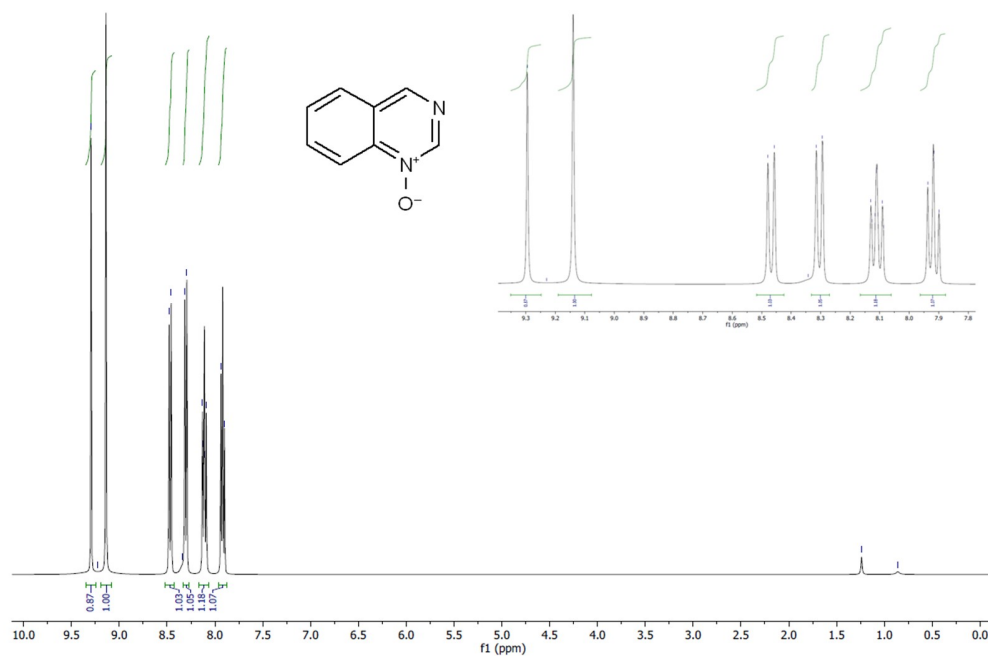

Quinazoline-1-oxide  $^{13}\text{C}$  NMR 100 MHz,  $\text{DMSO-d}_6$

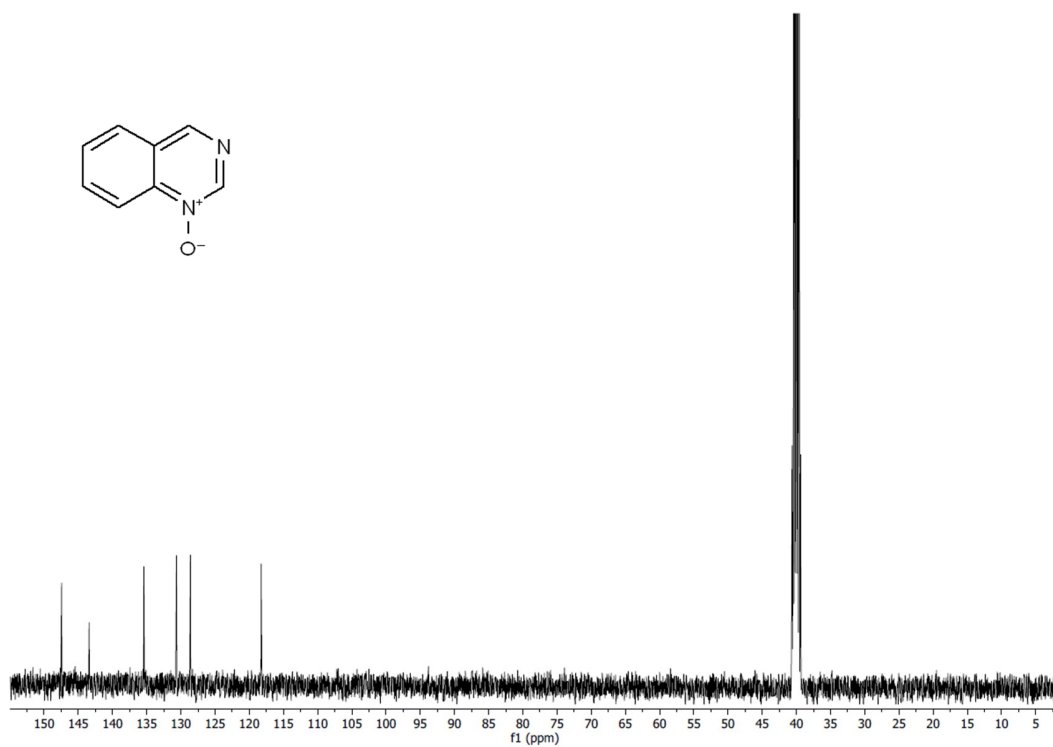

Supplement: s1 [file s1]
